# Supplementary material for: Excellent performance of carbon-coated TiO2/Li4Ti5O12 composites with low Li/Ti ratio for Li-ion storage
Source: Royal Society of Chemistry journal article supplement (doi:10.1039/c5ra16930e), 2015-01-01
Supplement: c5ra16930e1.pdf [file c5ra16930e1.pdf]

## Supporting Information

### Excellent performance of carbon-coated $\text{TiO}_2/\text{Li}_4\text{Ti}_5\text{O}_{12}$ composite with low Li/Ti ratio for Li-ion storage

Wei Yang, Xue Bai, Tao Li, Yuan-Yuan Ma, Yong-Xin Qi, Long-Wei Yin, Hui Li, Ning Lun\*,  
Yu-Jun Bai\*

Key Laboratory for Liquid–Solid Structural Evolution and Processing of Materials (Ministry of Education), Shandong University, Jinan 250061, People’s Republic of China

\*Corresponding author. Tel/Fax: +86 531 88392315. E-mail address: lunning66@sdu.edu.cn (N. Lun), [byj97@126.com](mailto:byj97@126.com) (Y.-J, Bai)

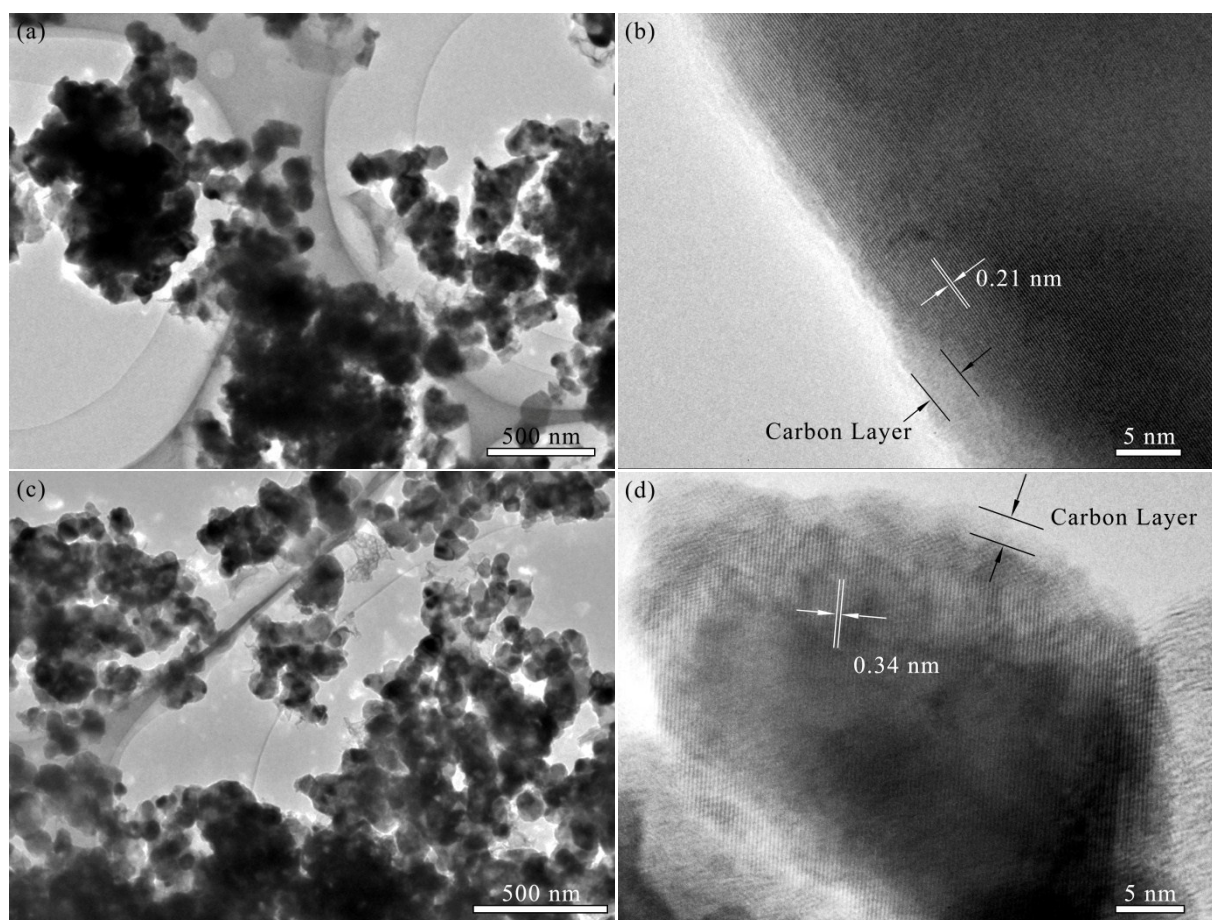

**Fig. S1** TEM images of C-LTO (a, b) and C-TiO<sub>2</sub> (c, d).

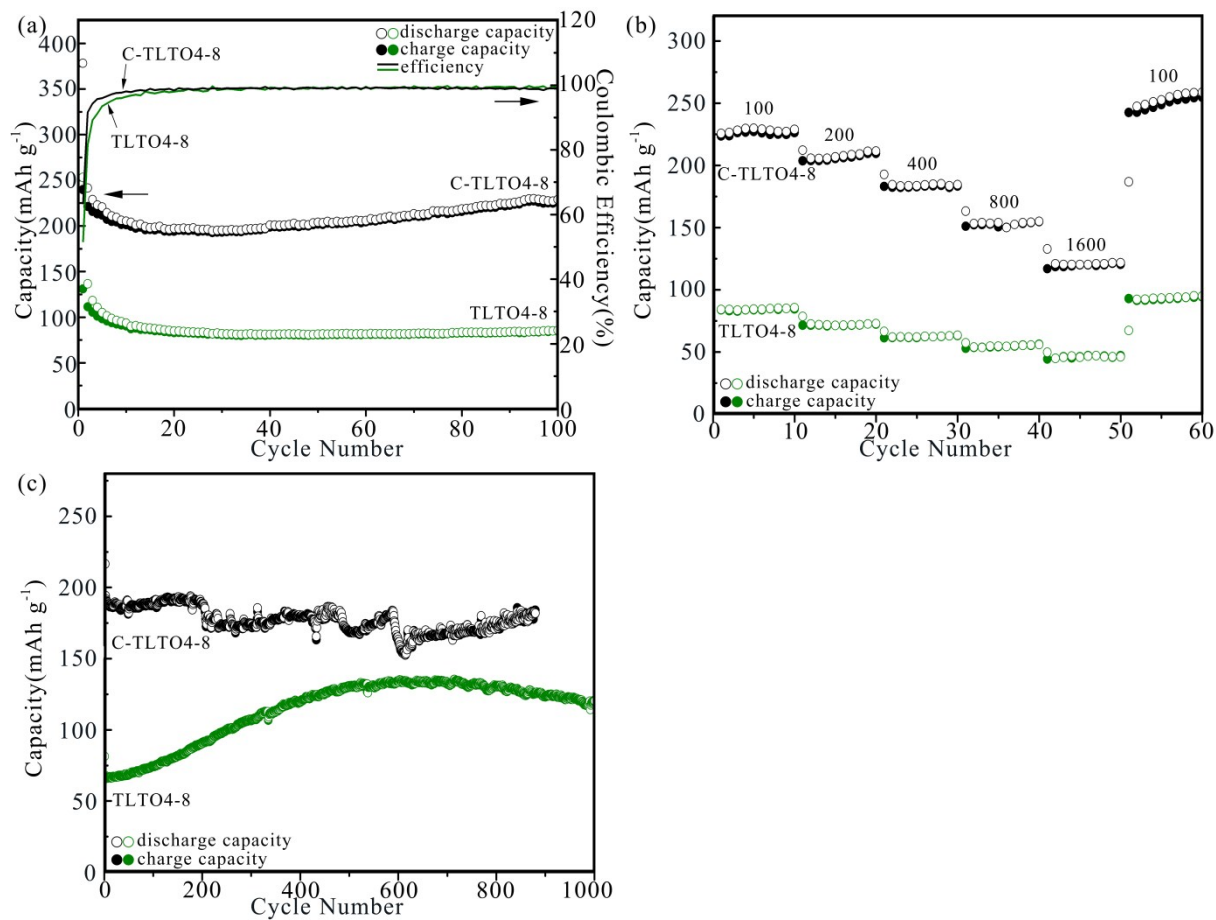

**Fig. S2** Comparison between C-TLTO4-8 and TLTO4-8, including cycling performance at 100 mA g<sup>-1</sup> (a), rate performance (b), and long-term cycling performance of C-TLTO4-8 at 500 mA g<sup>-1</sup> after the rate performance test (c).

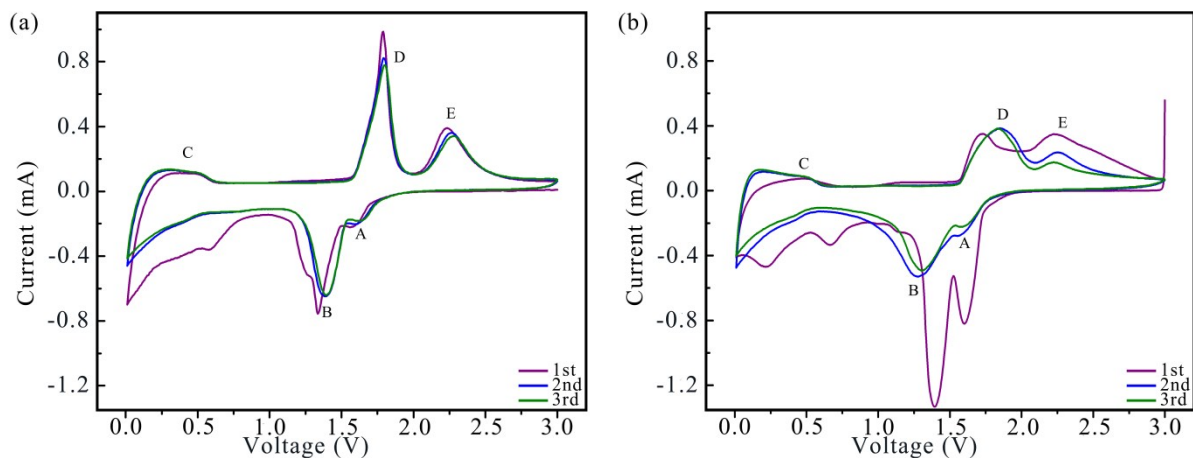

**Fig. S3** CV plots of C-TLTO4-8 (a) and TLTO4-8 (b) at the scan rate of 0.3 mV s<sup>-1</sup> between 0.01 and 3.0 V for the initial three cycles in the same scale.

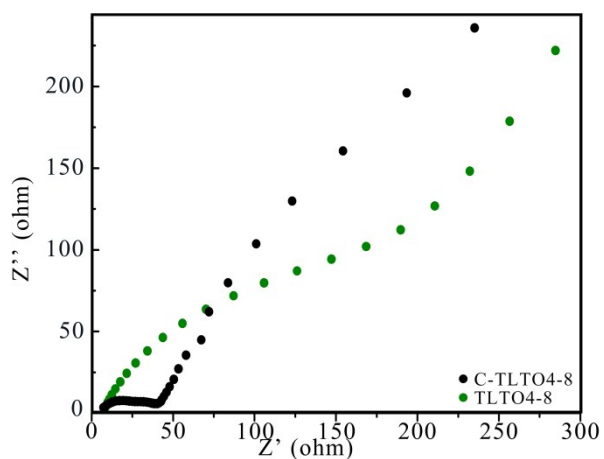

**Fig. S4** Impedance spectra of C-TLTO4-8 and TLTO4-8 after cycling 60 times at  $100 \text{ mA g}^{-1}$ .

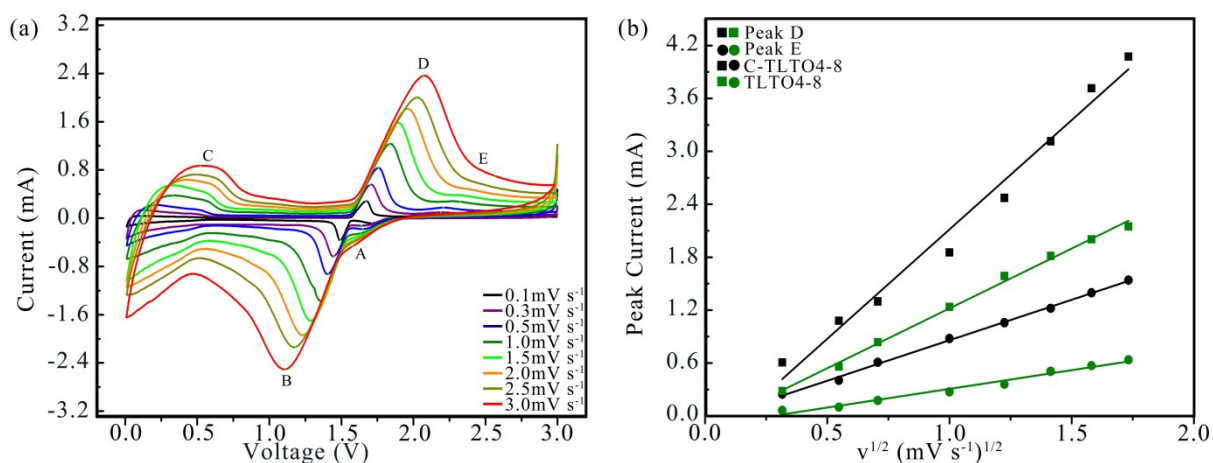

**Fig. S5** CV plots of TLTO4-8 at different scan rates between 0.01 and 3.0 V after the initial three cycles **(a)**, and the relationship between the peak current of D, E and scan rate in C-TLTO4-8 and TLTO4-8 **(b)**.
